# Supplementary material for: Enhancement of the Antibiofilm Activity of Nisin against Listeria monocytogenes Using Food Plant Extracts
Source: MDPI journal article supplement (doi:10.3390/pathogens12030444), 2023-03-12
Supplement: s1 [file s1]

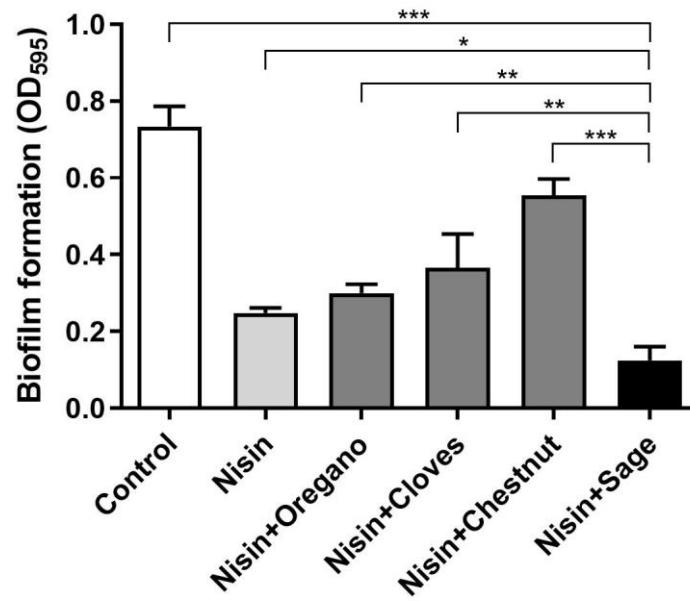

**Figure S1.** Biofilm formation of *Listeria monocytogenes* ATCC 19115 in the presence of 4  $\mu\text{g/mL}$  of nisin combined with 128  $\mu\text{g/mL}$  of ethanol extracts of oregano, cloves, chestnut, and sage. The data are presented as the means and standard deviations of triplicate samples in a single experiment. \*:  $p < 0.05$ , \*\*:  $p < 0.01$ , \*\*\*:  $p < 0.001$ .
